# Supplementary material for: Smoking and smoking cessation in relation to risk of diabetes in Chinese men and women: a 9-year prospective study of 0·5 million people
Source: PubMed Central journal article supplement (PMC5887081; doi:10.1016/s2468-2667(18)30026-4), 2018-03-13

# THE LANCET

## Child & Adolescent Health

### Supplementary appendix

This appendix formed part of the original submission and has been peer reviewed. We post it as supplied by the authors.

Supplement to: Liu X, Bragg F, Yang L, et al. Smoking and smoking cessation in relation to risk of diabetes in Chinese men and women: a 9-year prospective study of 0.5 million people. *Lancet Child Adolesc Health* 2018; published online March 13. [http://dx.doi.org/10.1016/S2468-2667\(18\)30026-4](http://dx.doi.org/10.1016/S2468-2667(18)30026-4).

## Supplementary appendix

- eTable 1. Adjusted HRs of incident diabetes by smoking status in men with additional exclusions or adjustments**
- eTable 2. Adjusted HRs of incident diabetes by amount smoked and adiposity in men**
- eTable 3. Baseline characteristics of women by smoking status**
- eTable 4. Baseline characteristics of male ex-smokers by reasons for, and years after, smoking cessation at baseline**
- eTable 5. Age-specific prevalence of diabetes in CKB versus age-specific prevalence in nationally representative surveys in China**
- eFigure 1. Adjusted mean adiposity levels by smoking status and daily smoking amount in men**
- eFigure 2. Adjusted HRs of incident diabetes by current regular smoking in men**
- eFigure 3. Adjusted HRs of incident diabetes associated with ever regular smoking by study area in men**
- eFigure 4. Adjusted HRs of incident diabetes associated with ever regular smoking by selected baseline characteristics in men**
- eFigure 5. Adjusted HRs of incident diabetes in male ex-smokers by reasons for, and years after (as a time-updating variable), smoking cessation**
- eFigure 6. Adjusted HRs of incident diabetes associated with ever regular smoking by selected baseline characteristics in women**
- eFigure 7. Adjusted mean adiposity levels in never smokers, current smokers and ex-smokers by years after cessation in men**

**eTable 1. Adjusted HRs of incident diabetes by smoking status in men with additional exclusions or adjustments**

|                                                                    | Urban        |                  | Rural        |                  | Overall      |                  |
|--------------------------------------------------------------------|--------------|------------------|--------------|------------------|--------------|------------------|
|                                                                    | No. of cases | HR (95% CI)*     | No. of cases | HR (95% CI)*     | No. of cases | HR (95% CI)*     |
| <b>Excluding individuals with prior CVD and cancer at baseline</b> |              |                  |              |                  |              |                  |
| Never smokers                                                      | 339          | 1.00 (0.89-1.12) | 301          | 1.00 (0.89-1.12) | 640          | 1.00 (0.92-1.08) |
| Ex-smokers                                                         | 195          | 1.12 (0.97-1.28) | 194          | 1.00 (0.87-1.15) | 389          | 1.05 (0.95-1.16) |
| Occasional smokers                                                 | 246          | 1.13 (0.99-1.28) | 274          | 1.11 (0.98-1.25) | 520          | 1.12 (1.03-1.22) |
| Ever regular smokers†                                              | 1293         | 1.22 (1.15-1.30) | 1955         | 1.09 (1.04-1.14) | 3248         | 1.15 (1.11-1.19) |
| <i>p for heterogeneity</i>                                         |              | 0.018            |              | 0.35             |              | 0.014            |
| <b>Excluding diabetes cases during first 3-year follow-up</b>      |              |                  |              |                  |              |                  |
| Never smokers                                                      | 395          | 1.00 (0.90-1.11) | 314          | 1.00 (0.89-1.12) | 709          | 1.00 (0.93-1.08) |
| Ex-smokers                                                         | 227          | 1.11 (0.97-1.26) | 195          | 0.99 (0.86-1.14) | 422          | 1.05 (0.95-1.15) |
| Occasional smokers                                                 | 261          | 1.07 (0.95-1.21) | 283          | 1.13 (1.00-1.27) | 544          | 1.10 (1.01-1.20) |
| Ever regular smokers†                                              | 1412         | 1.17 (1.11-1.24) | 2016         | 1.10 (1.05-1.15) | 3428         | 1.13 (1.09-1.17) |
| <i>p for heterogeneity</i>                                         |              | 0.052            |              | 0.20             |              | 0.023            |
| <b>Further adjusting for fruit and meat intake frequency</b>       |              |                  |              |                  |              |                  |
| Never smokers                                                      | 400          | 1.00 (0.90-1.11) | 319          | 1.00 (0.89-1.12) | 719          | 1.00 (0.93-1.08) |
| Ex-smokers                                                         | 229          | 1.11 (0.97-1.26) | 201          | 0.99 (0.86-1.14) | 430          | 1.05 (0.95-1.15) |
| Occasional smokers                                                 | 268          | 1.09 (0.97-1.23) | 291          | 1.14 (1.01-1.28) | 559          | 1.12 (1.03-1.21) |
| Ever regular†                                                      | 1426         | 1.17 (1.10-1.24) | 2060         | 1.10 (1.05-1.15) | 3486         | 1.13 (1.09-1.17) |
| <i>p for heterogeneity</i>                                         |              | 0.079            |              | 0.21             |              | 0.029            |

\* Stratified by age-at-risk and study area and adjusted for education, alcohol consumption, physical activity, body mass index and waist circumference.

† Ever regular includes participants who stopped smoking due to illness.

**eTable 2. Adjusted HRs of incident diabetes by amount smoked and adiposity in men**

|                                 | Never smokers |                  | Cigarette or equivalent (g/day) |                  |              |                  |              |                   |
|---------------------------------|---------------|------------------|---------------------------------|------------------|--------------|------------------|--------------|-------------------|
|                                 |               |                  | <20                             |                  | 20-29        |                  | 30+          |                   |
|                                 | No. of cases  | HR (95% CI)*     | No. of cases                    | HR (95% CI)*     | No. of cases | HR (95% CI)*     | No. of cases | HR (95% CI)*      |
| <b>BMI (kg/m<sup>2</sup>)</b>   |               |                  |                                 |                  |              |                  |              |                   |
| <24.0                           | 214           | 1.00 (0.87-1.15) | 495                             | 0.98 (0.89-1.07) | 525          | 1.03 (0.94-1.12) | 243          | 1.27 (1.12-1.44)  |
| 24.0-27.9                       | 331           | 2.46 (2.20-2.74) | 600                             | 2.80 (2.59-3.04) | 619          | 3.01 (2.78-3.25) | 291          | 3.38 (3.01-3.79)  |
| ≥28.0                           | 174           | 5.40 (4.64-6.29) | 249                             | 5.44 (4.80-6.17) | 280          | 6.35 (5.64-7.15) | 184          | 9.02 (7.80-10.43) |
| <b>Waist circumference (cm)</b> |               |                  |                                 |                  |              |                  |              |                   |
| <85.0                           | 268           | 1.00 (0.89-1.13) | 559                             | 0.90 (0.83-0.98) | 584          | 0.92 (0.85-1.00) | 264          | 1.11 (0.98-1.25)  |
| 85.0-94.9                       | 276           | 2.31 (2.05-2.61) | 524                             | 2.64 (2.42-2.88) | 521          | 2.66 (2.44-2.90) | 248          | 3.01 (2.66-3.41)  |
| ≥95.0                           | 175           | 4.67 (4.01-5.44) | 261                             | 4.64 (4.10-5.25) | 319          | 5.64 (5.05-6.30) | 206          | 7.49 (6.53-8.60)  |
| <b>Body fat percentage</b>      |               |                  |                                 |                  |              |                  |              |                   |
| <25.0                           | 366           | 1.00 (0.90-1.11) | 690                             | 0.91 (0.85-0.99) | 689          | 0.94 (0.87-1.02) | 315          | 1.14 (1.02-1.28)  |
| 25.0-29.9                       | 319           | 2.31 (2.07-2.59) | 596                             | 2.53 (2.33-2.75) | 640          | 2.74 (2.53-2.97) | 345          | 3.53 (3.17-3.93)  |
| ≥30.0                           | 34            | 3.56 (2.54-4.99) | 58                              | 3.48 (0.69-4.50) | 95           | 5.65 (4.62-6.92) | 58           | 7.05 (5.44-9.13)  |

\* Stratified by age-at-risk and study area and adjusted for education, alcohol consumption and physical activity.

**eTable 3. Baseline characteristics of women by smoking status**

| <b>Characteristic</b>               | <b>Never smokers<br/>(n = 270005)</b> | <b>Ex-smokers<br/>(n = 1049)</b> | <b>Occasional smokers<br/>(n = 5150)</b> | <b>Ever regular smokers<br/>(n = 7811)</b> |
|-------------------------------------|---------------------------------------|----------------------------------|------------------------------------------|--------------------------------------------|
| Age (SD), years                     | 50.1 (10.3)                           | 61.0 (9.2)                       | 51.9 (10.8)                              | 58.7 (10.1)                                |
| Urban residence                     | 118785 (44.2%)                        | 530 (44.0%)                      | 1946 (39.1%)                             | 2772 (38.0%)                               |
| Education >6 years                  | 119853 (44.1%)                        | 244 (35.4%)                      | 2276 (46.9%)                             | 1862 (41.2%)                               |
| Exhaled carbon monoxide (SD), ppm   | 4.5 (4.9)                             | 5.6 (7.8)                        | 5.5 (8.6)                                | 11.7 (26.4)                                |
| Random plasma glucose (SD), mmol/L* | 5.7 (1.1)                             | 5.7 (1.3)                        | 5.7 (1.7)                                | 5.7 (2.6)                                  |
| Systolic blood pressure (SD), mmHg  | 129.1 (19.6)                          | 126.2 (25.1)                     | 127.1 (30.4)                             | 125.4 (52.4)                               |
| Diastolic blood pressure (SD), mmHg | 76.7 (10.6)                           | 76.2 (15.1)                      | 76.3 (16.4)                              | 75.5 (31.1)                                |
| Weight (SD), kg                     | 56.5 (8.7)                            | 58.8 (12.8)                      | 57.4 (14.6)                              | 57.1 (24.7)                                |
| Height (SD), cm                     | 154.2 (5.3)                           | 154.7 (7.4)                      | 154.5 (8.3)                              | 154.9 (15.2)                               |
| BMI (SD), kg/m <sup>2</sup>         | 23.7 (3.3)                            | 24.5 (4.7)                       | 24.0 (5.5)                               | 23.7 (9.9)                                 |
| Waist circumference (SD), cm        | 78.7 (8.9)                            | 81.9 (12.2)                      | 79.6 (14.5)                              | 79.8 (30.1)                                |
| Waist-hip-ratio (SD)                | 0.9 (0.1)                             | 0.9 (0.1)                        | 0.9 (0.1)                                | 0.9 (0.2)                                  |
| Percent body fat (SD), % ‡          | 31.9 (6.8)                            | 33.0 (10.2)                      | 32.4 (11.2)                              | 32.2 (21.0)                                |
| Physical activity (SD), MET-hr/day  | 20.8 (10.6)                           | 17.7 (16.0)                      | 19.7 (18.3)                              | 18.4 (38.4)                                |
| Regular alcohol drinkers            | 5911 (2.4%)                           | 186 (18.0%)                      | 833 (11.7%)                              | 1496 (12.2%)                               |
| Regular tea drinkers                | 57453 (21.0%)                         | 169 (28.1%)                      | 1141 (29.5%)                             | 1805 (33.5%)                               |
| Regular meat consumption            | 118867 (43.9%)                        | 408 (45.0%)                      | 2249 (43.5%)                             | 3123 (46.9%)                               |
| Regular fresh fruit consumption     | 86232 (32.1%)                         | 414 (38.2%)                      | 1778 (34.1%)                             | 2079 (27.1%)                               |
| Family history of diabetes          | 18072 (6.6%)                          | 44 (8.5%)                        | 380 (6.8%)                               | 406 (8.9%)                                 |

Values are means (SD) standardised to age and study area structure of the study population or number of participants (% standardised to age and study area structure of study population). BMI: body mass index; MET: metabolic equivalent task; Ex-smokers: ex-smokers who stopped by choice; Ever regular smokers: current smokers and ex-smokers who stopped due to illness.

\* Data missing for 4681 participants.

‡ Data missing for 110 participants.

**eTable 4. Baseline characteristics of male ex-smokers by reasons for, and years after, smoking cessation at baseline**

| Characteristic                      | Never smokers<br>(n = 28214) | Ex-smokers stopped by choice |                          |                        | Ex-smokers stopped due to illness |                          |                        |
|-------------------------------------|------------------------------|------------------------------|--------------------------|------------------------|-----------------------------------|--------------------------|------------------------|
|                                     |                              | ≥15 years<br>(n = 3388)      | 5-14 years<br>(n = 5807) | <5 years<br>(n = 3755) | ≥15 years<br>(n = 2429)           | 5-14 years<br>(n = 5417) | <5 years<br>(n = 4612) |
| Age (SD), years                     | 53.5 (11.9)                  | 59.4 (10)                    | 54.9 (10.7)              | 53.3 (11.1)            | 61.3 (9.2)                        | 57.9 (10.4)              | 57.3 (10.4)            |
| Urban residence                     | 15278 (54.6%)                | 2094 (59.1%)                 | 3021 (52.5%)             | 1600 (43.4%)           | 1350 (49.9%)                      | 2439 (43.7%)             | 1648 (34.9%)           |
| Education >6 years                  | 18622 (61.4%)                | 2099 (62.0%)                 | 3418 (59.8%)             | 2112 (58.4%)           | 1214 (57.7%)                      | 2570 (56.6%)             | 1886 (52.8%)           |
| Random plasma glucose (SD), mmol/L* | 5.7 (1.2)                    | 5.7 (1.3)                    | 5.7 (1.3)                | 5.7 (1.3)              | 5.7 (1.6)                         | 5.7 (1.3)                | 5.7 (1.4)              |
| Systolic blood pressure (SD), mmHg  | 134.4 (20.2)                 | 136.5 (22.7)                 | 135.7 (20.5)             | 134.0 (20.4)           | 136.0 (24.2)                      | 136.0 (21.9)             | 135.3 (23.6)           |
| Diastolic blood pressure (SD), mmHg | 79.6 (11.4)                  | 81.0 (14.1)                  | 80.4 (12)                | 79.6 (11.6)            | 80.8 (15.5)                       | 80.2 (12.9)              | 80.3 (14.1)            |
| Physical activity (SD), MET-hr/day  | 19.6 (13.0)                  | 19.0 (16.1)                  | 19.8 (12.7)              | 19.6 (12.5)            | 19.1 (19.4)                       | 19.0 (13.9)              | 17.5 (13.0)            |
| Regular alcohol drinkers            | 6627 (24.4%)                 | 1618 (47.3%)                 | 2905 (47.7%)             | 1690 (44.8%)           | 1200 (47.5%)                      | 2688 (48.9%)             | 2250 (48.0%)           |
| Regular tea drinkers                | 10166 (48.7%)                | 1536 (46.7%)                 | 2890 (50.2%)             | 1758 (52.0%)           | 1115 (53.9%)                      | 2536 (49.4%)             | 2102 (49.3%)           |
| Regular meat consumption            | 15356 (51.7%)                | 1861 (53.6%)                 | 3227 (55.6%)             | 1925 (55.8%)           | 1280 (54.3%)                      | 2707 (54.6%)             | 2057 (53.0%)           |
| Regular fresh fruit consumption     | 9310 (32.1%)                 | 1236 (33.1%)                 | 1811 (31.3%)             | 897 (27.3%)            | 818 (31.6%)                       | 1553 (31.5%)             | 1004 (26.2%)           |
| COPD                                | 904 (8.3%)                   | 140 (8.5%)                   | 160 (7.8%)               | 110 (10.1%)            | 306 (16.2%)                       | 572 (15.6%)              | 478 (16.3%)            |
| Cardiovascular diseases             | 1588 (6.1%)                  | 295 (6.1%)                   | 278 (5.0%)               | 138 (4.4%)             | 271 (7.8%)                        | 708 (12.1%)              | 709 (16.0%)            |
| Hypertension                        | 3619 (14.1%)                 | 657 (15.5%)                  | 810 (13.5%)              | 393 (11.1%)            | 552 (18.1%)                       | 1241 (20.1%)             | 1065 (21.9%)           |
| Cancer                              | 127 (0.5%)                   | 16 (0.3%)                    | 25 (0.4%)                | 13 (0.4%)              | 42 (1.4%)                         | 105 (1.7%)               | 175 (3.4%)             |
| Family history of diabetes          | 1826 (6.1%)                  | 222 (6.3%)                   | 355 (5.9%)               | 212 (5.6%)             | 136 (7.2%)                        | 343 (6.6%)               | 213 (5.4%)             |

Values are means (SD) standardised to age and study area structure of the study population or number of participants (% standardised to age and study area structure of study population). COPD: chronic obstructive pulmonary disease; MET: metabolic equivalent task.

Prevalence of prior diagnosed diabetes in CKB population at baseline: never smokers 4.0%; ex-smokers stopped by choice 4.5%; ex-smokers stopped due to illness 6.5%.

\* Data missing for 2956 participants.

**eTable 5. Age-specific prevalence of diabetes in CKB versus age-specific prevalence in nationally representative surveys in China**

| Age group (years) | Diabetes prevalence, % (95% CI)     |                           |                    |                                |                  |                  |                                |                  |                  |
|-------------------|-------------------------------------|---------------------------|--------------------|--------------------------------|------------------|------------------|--------------------------------|------------------|------------------|
|                   | CKB resurvey population (n=14,881)* |                           |                    | 2010 China survey <sup>†</sup> |                  |                  | 2013 China survey <sup>‡</sup> |                  |                  |
|                   | Diagnosed <sup>§</sup>              | Undiagnosed <sup>  </sup> | Total <sup>¶</sup> | Diagnosed                      | Undiagnosed      | Total            | Diagnosed                      | Undiagnosed      | Total            |
| 40-49             | 5.5 (4.8-6.1)                       | 4.7 (4.1-5.3)             | 10.2 (9.3-11.1)    | 3.2 (2.9-3.4)                  | 8.1 (7.7-8.6)    | 11.3 (10.8-11.8) | N/A                            | N/A              | N/A              |
| 50-59             | 8.5 (7.7-9.3)                       | 5.5 (4.9-6.2)             | 14.0 (13.1-15.0)   | 5.9 (5.5-6.2)                  | 11.8 (11.2-12.3) | 17.6 (17.0-18.3) | N/A                            | N/A              | N/A              |
| 60-69             | 11.5 (10.2-12.7)                    | 6.3 (5.4-7.3)             | 17.8 (16.3-19.3)   | 8.3 (7.8-8.9)                  | 14.1 (13.4-14.9) | 22.5 (21.6-23.4) | N/A                            | N/A              | N/A              |
| ≥70               | 10.7 (8.2-13.2)                     | 5.2 (3.2-7.1)             | 15.8 (12.8-18.9)   | 8.0 (7.3-8.8)                  | 15.5 (14.4-16.6) | 23.5 (22.3-24.7) | N/A                            | N/A              | N/A              |
| <40               | 2.7 (1.9-3.4)                       | 2.5 (1.8-3.1)             | 5.1 (4.2-6.1)      | N/A                            | N/A              | N/A              | 1.3 (1.0-1.7)                  | 4.5 (4.1-4.9)    | 5.9 (5.1-6.6)    |
| 40-59             | 7.1 (6.6-7.6)                       | 5.1 (4.7-5.6)             | 12.2 (11.5-12.8)   | N/A                            | N/A              | N/A              | 5.0 (4.7-5.4)                  | 7.8 (7.5-8.1)    | 12.9 (12.3-13.5) |
| ≥60               | 11.3 (10.2-12.4)                    | 6.1 (5.3-7.0)             | 17.5 (16.1-18.8)   | N/A                            | N/A              | N/A              | 8.8 (8.0-9.5)                  | 11.4 (10.8-12.0) | 20.2 (19.1-21.2) |

\* Participants included in both first and second resurvey.

<sup>†</sup> Xu Y, Wang L, He J, et al. Prevalence and control of diabetes in Chinese adults. *JAMA*. 2013;310(9):948-959.

<sup>‡</sup> Wang L, Gao P, Huang Z, et al. Prevalence and Ethnic Pattern of Diabetes and Prediabetes in China in 2013. *JAMA* 2017;317(24):2515-2523.

<sup>§</sup> Diabetes at baseline or incident diabetes (identified through disease surveillance system, health insurance system or death registries).

<sup>||</sup> Self-reported or screen-detected diabetes in first or second resurvey, no diabetes at baseline and no incident diabetes (identified through disease surveillance system, health insurance system or death registries).

<sup>¶</sup> Diabetes at baseline, first or second resurvey or incident diabetes (identified through disease surveillance system, health insurance system or death registries).

**eFigure 1. Adjusted mean adiposity levels by smoking status and daily smoking amount in men**

Model 1 adjusted for age and study area. BF%: body fat percentage; BMI: body mass index; WC: waist circumference.

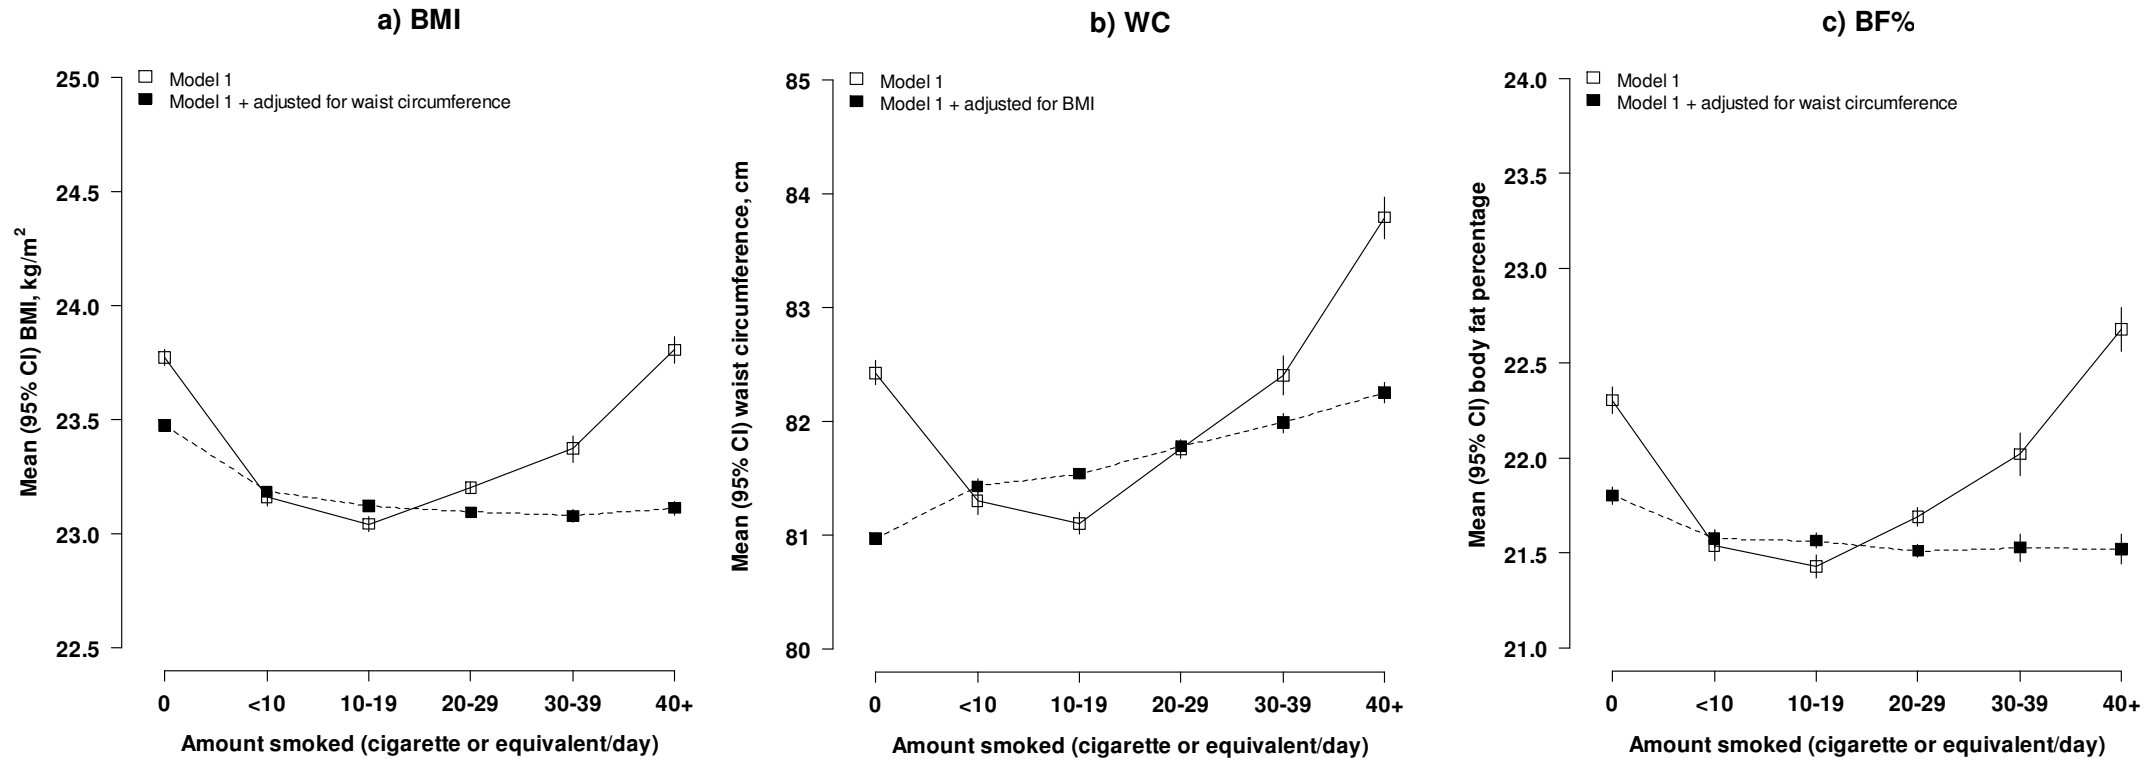



## eFigure 2. Adjusted HRs of incident diabetes by current regular smoking in men

Stratified by age-at-risk and study area and adjusted for education, alcohol consumption, physical activity, BMI and waist circumference. Smoking duration analyses were additionally adjusted for age at baseline. Tests for trend included all smoking categories. Tests for heterogeneity included smokers only.

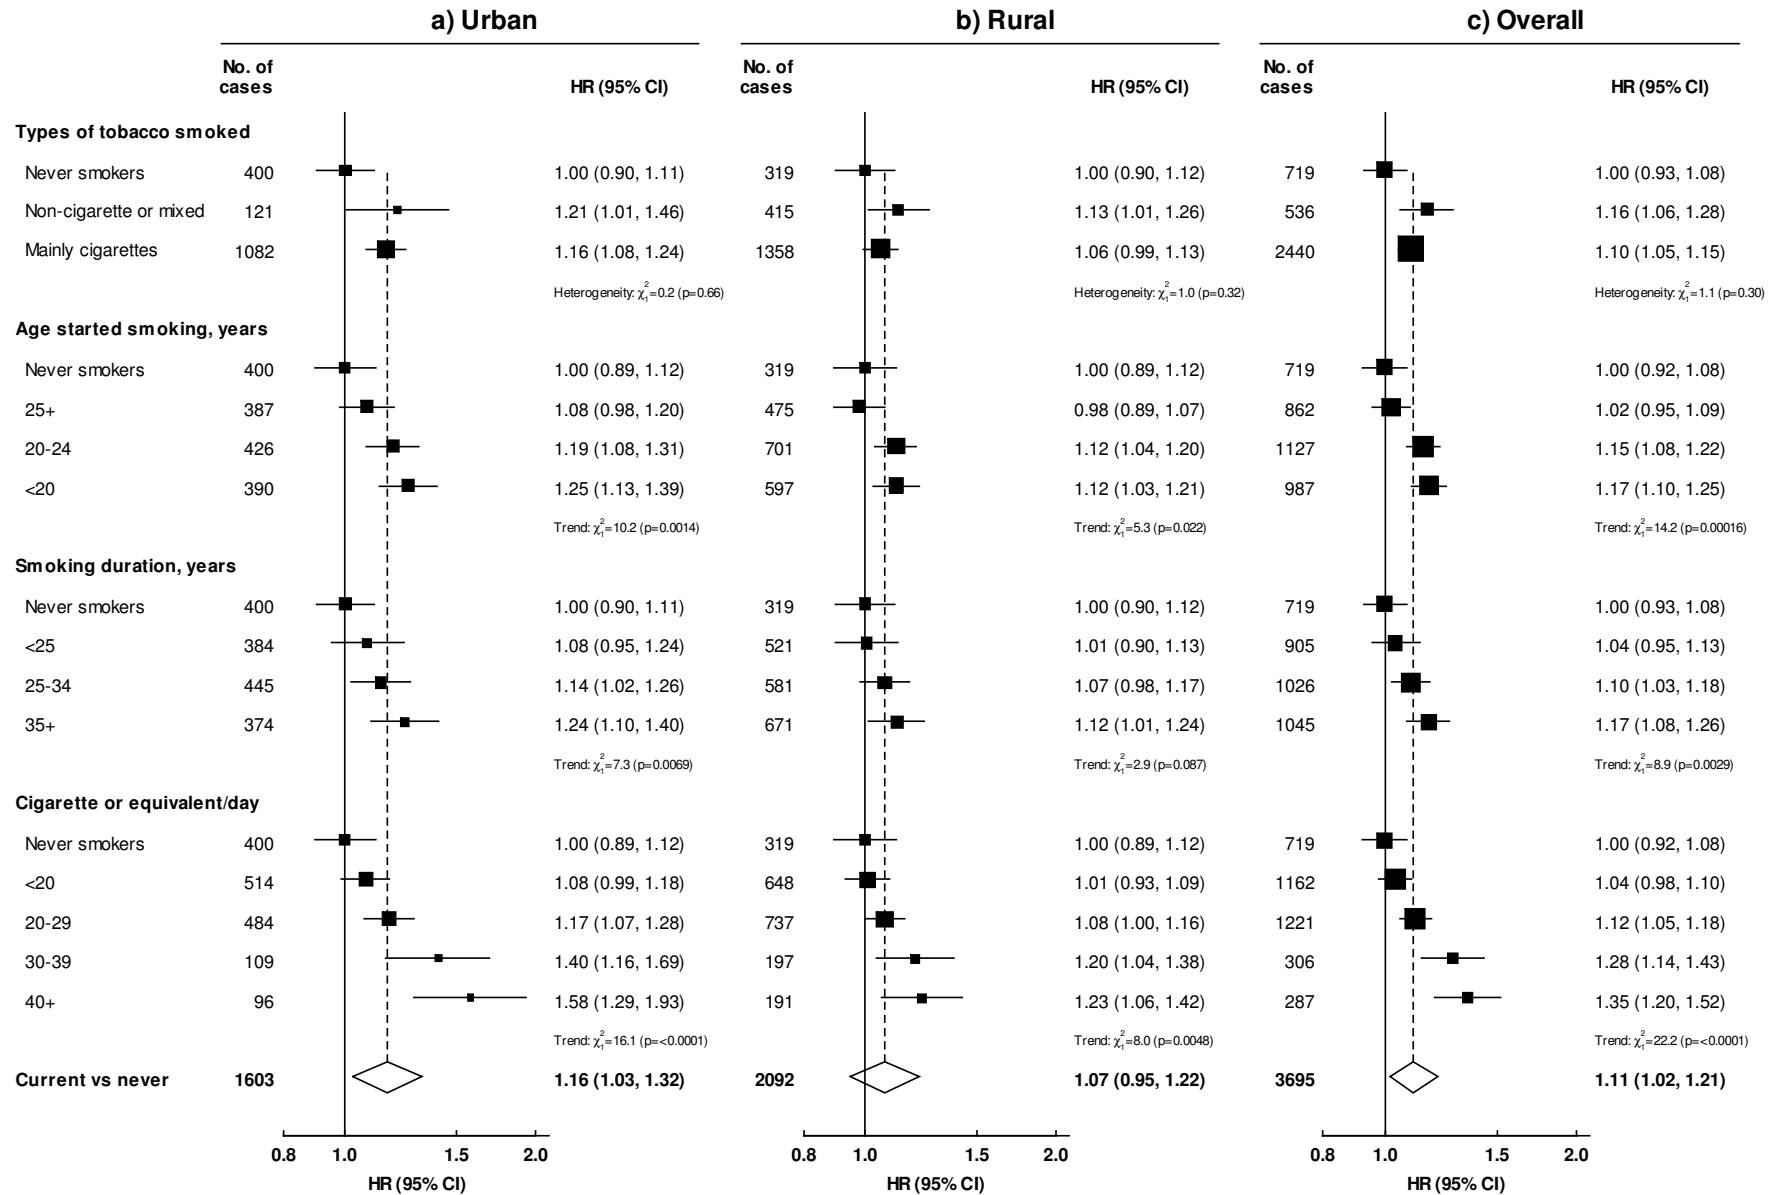

**eFigure 3. Adjusted HRs of incident diabetes associated with ever regular smoking by study area in men**

Stratified by age-at-risk and adjusted for education, alcohol consumption, physical activity, BMI and waist circumference.

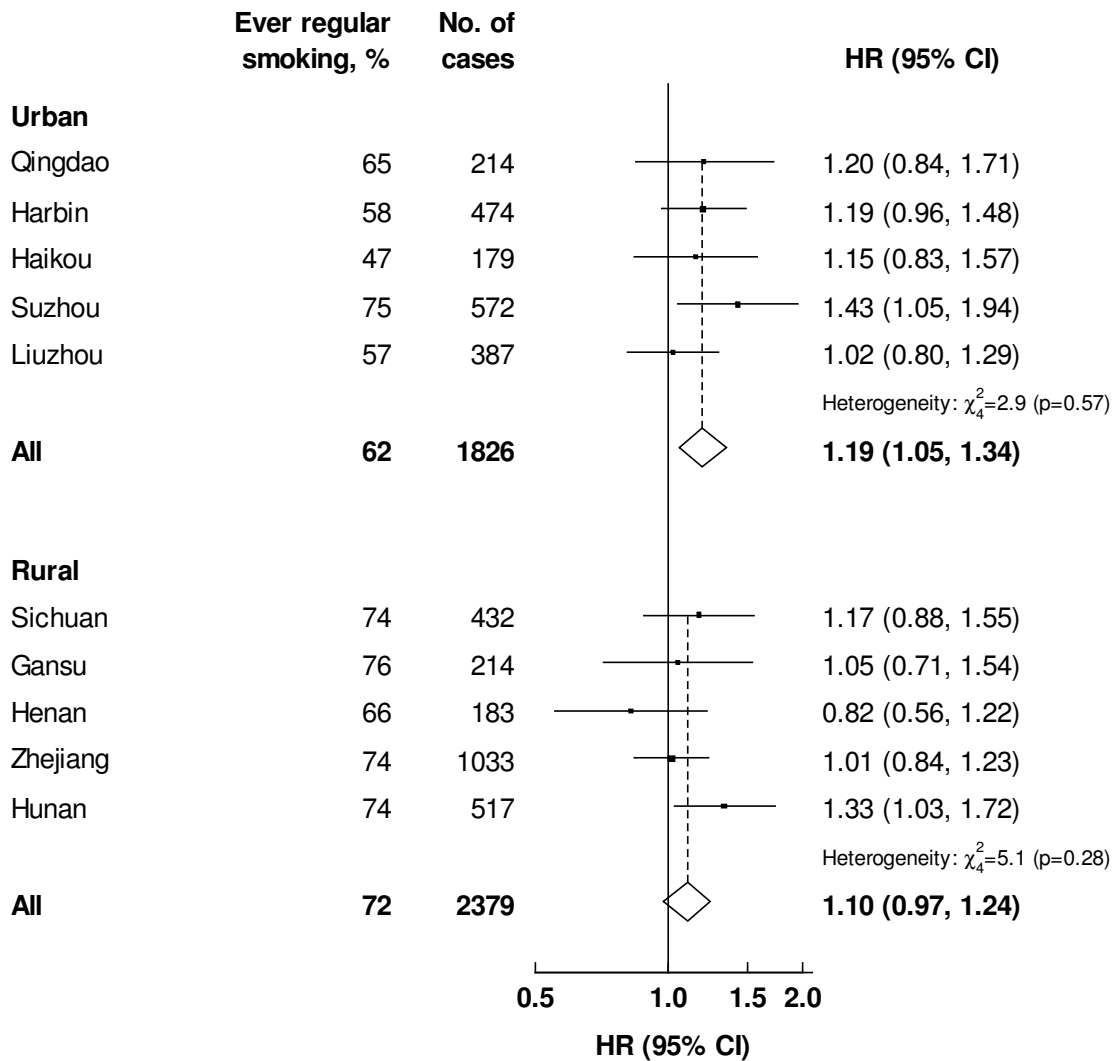

**eFigure 4. Adjusted HRs of incident diabetes associated with ever regular smoking by selected baseline characteristics in men**

Stratified by age-at-risk and study area and adjusted (except where it is the variable of interest) for education, alcohol consumption, physical activity, BMI and waist circumference. BMI: body mass index; MET: metabolic equivalent of task; SBP: systolic blood pressure.

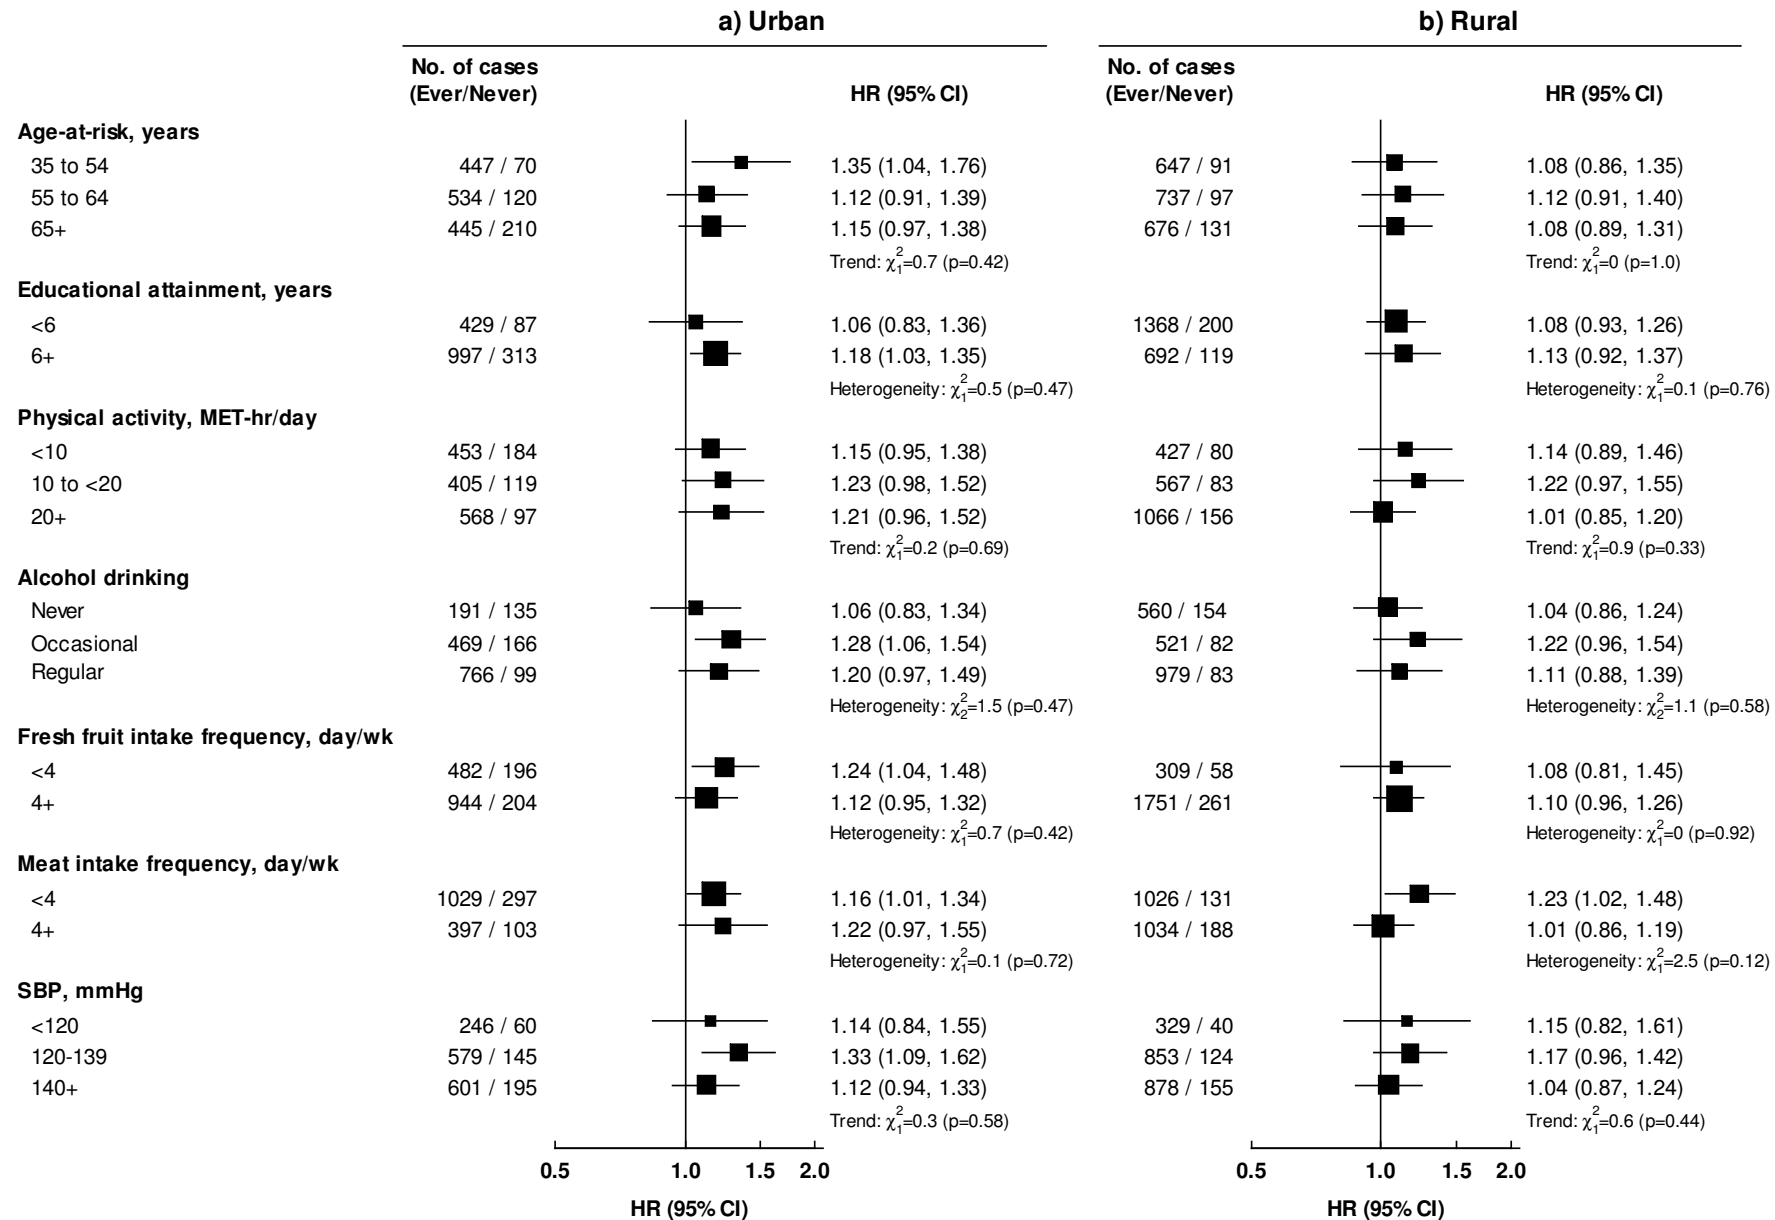

**eFigure 5. Adjusted HRs of incident diabetes in male ex-smokers by reasons for, and years after (as a time-updating variable), smoking cessation**

Model 1: stratified by age at risk and study area and adjusted for education, alcohol consumption and physical activity. Model 2: additionally adjusted for BMI and waist circumference. Tests for trend include only ex- smokers. BMI: body mass index.

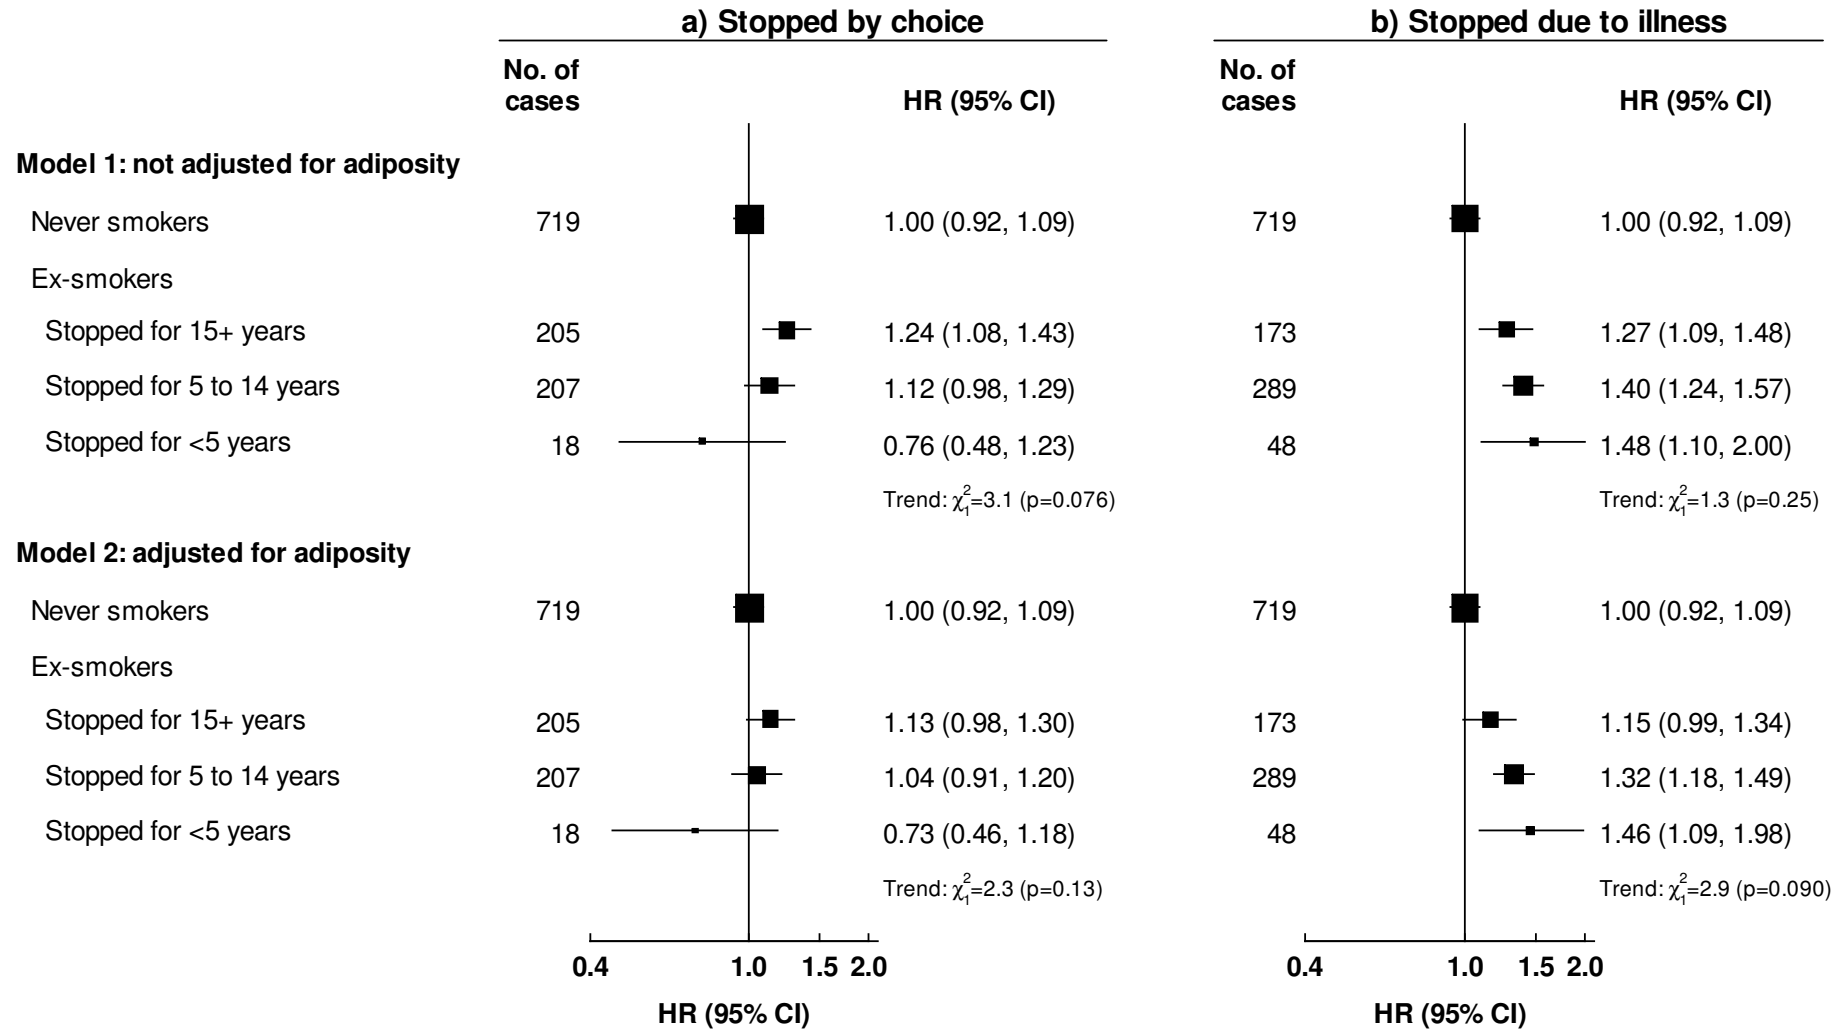

**eFigure 6. Adjusted HRs of incident diabetes associated with ever regular smoking by selected baseline characteristics in women**

Stratified by age-at-risk and study area and adjusted (except where it is the variable of interest) for education, alcohol consumption, physical activity, BMI and waist circumference. BMI: body mass index; MET: metabolic equivalent of task; SBP: systolic blood pressure.

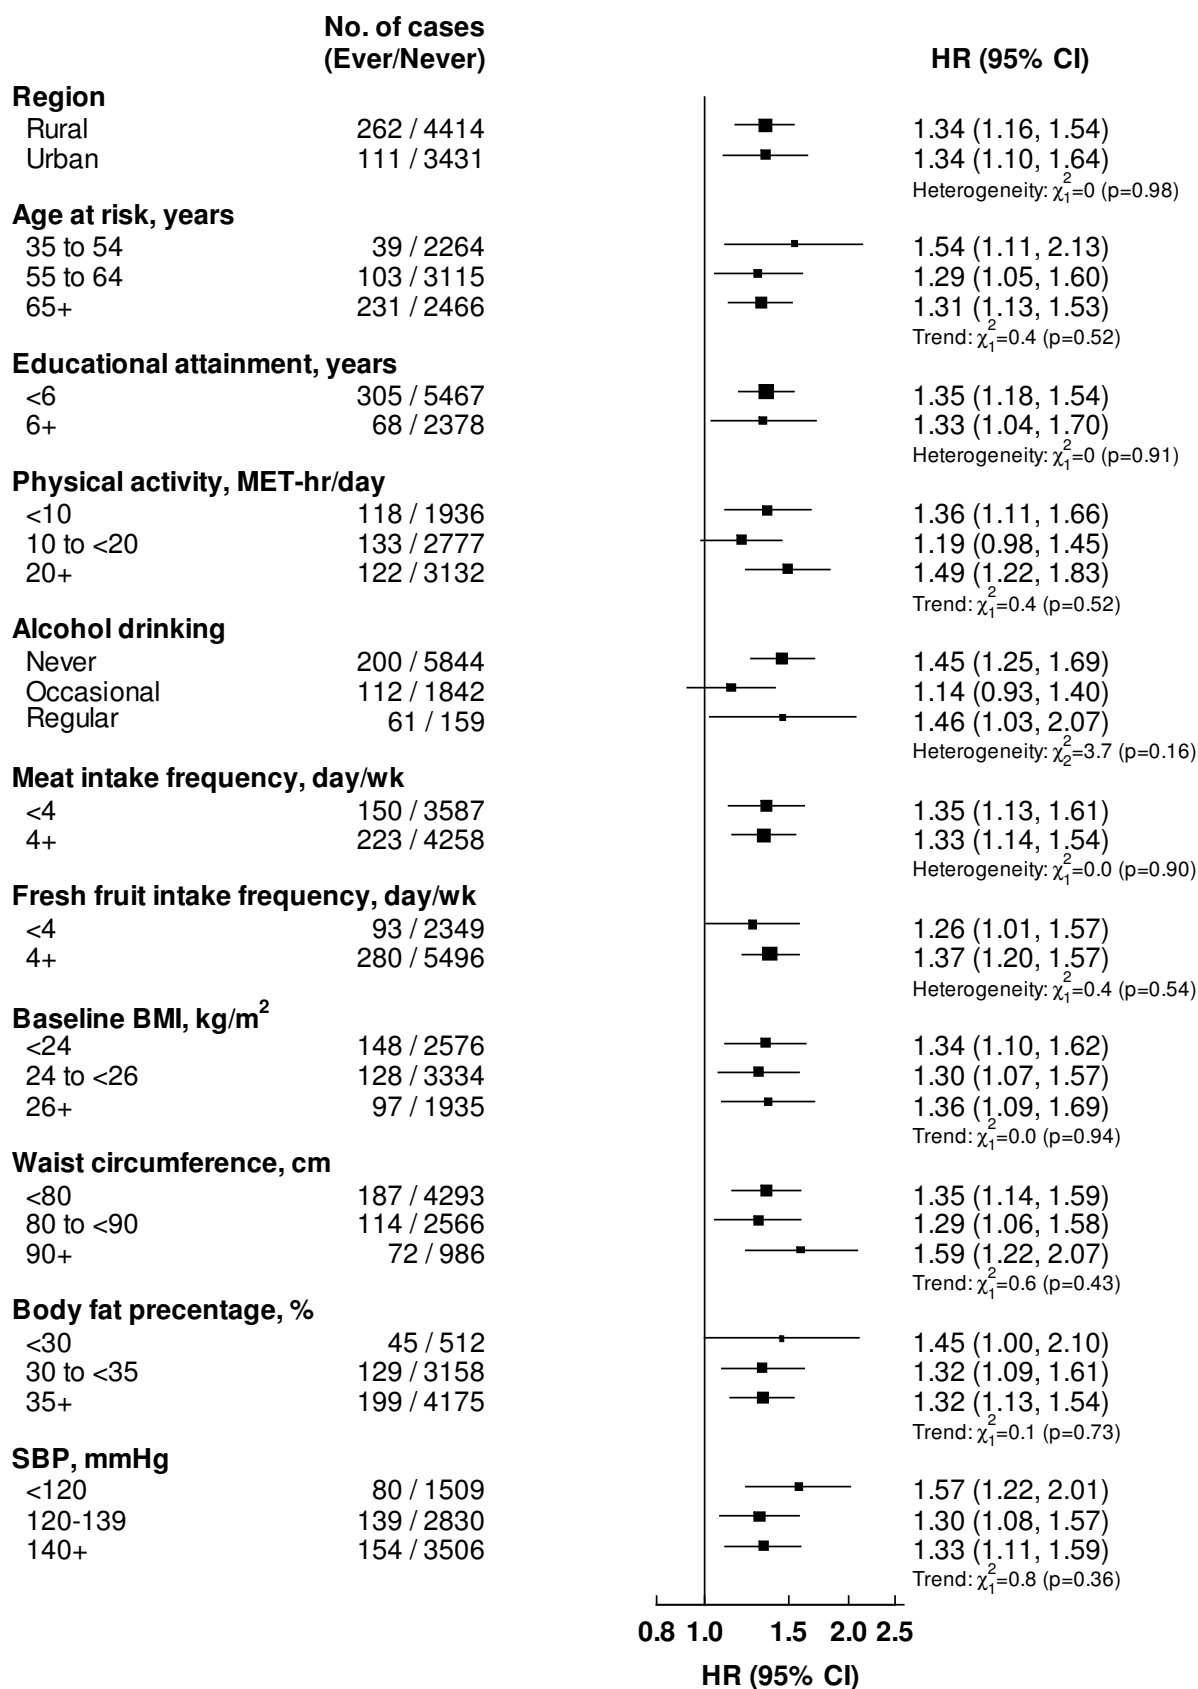

**eFigure 7. Adjusted mean adiposity levels in never smokers, current smokers and ex-smokers by years after cessation in men**  
 Adjusted for age and study area. BF%:body fat percentage; BMI: body mass index; WC: waist circumference.

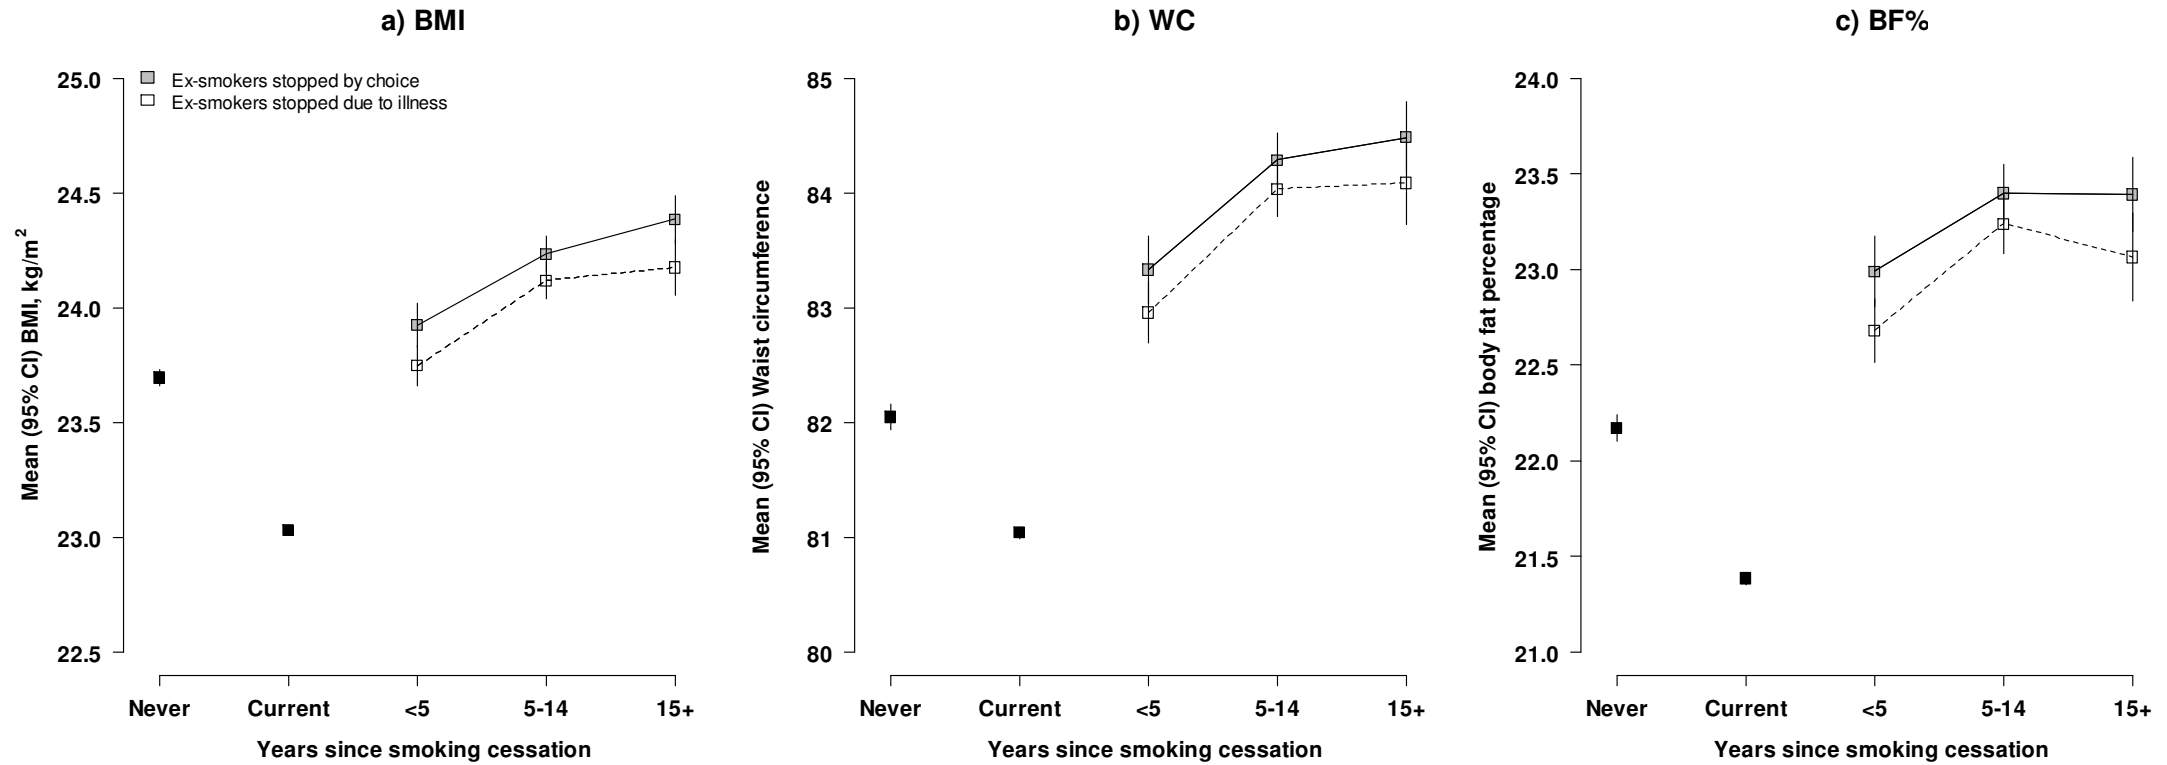

Supplement: mmc1.pdf [file mmc1.pdf]
